# Supplementary material for: 2-D porous Ni3N–Co3N hybrids derived from ZIF-67/Ni(OH)2 sheets as a magnetically separable catalyst for hydrogenation reactions
Source: Royal Society of Chemistry journal article supplement (doi:10.1039/c8cc06099a), 2018-01-01
Supplement: c8cc06099a1.pdf [file c8cc06099a1.pdf]

**2-D porous Ni<sub>3</sub>N-Co<sub>3</sub>N hybrids derived from ZIF-67/Ni(OH)<sub>2</sub> sheets as a  
magnetically separable catalyst for hydrogenation reaction**

Lin Zhang, Aiping Wu, Mei Tian, Yinglu Xiao, Xia Shi, Haijing Yan, Chungui Tian\*  
and Honggang Fu\*

Key Laboratory of Functional Inorganic Material Chemistry, Ministry of Education,  
Heilongjiang University, Harbin 150080, People's Republic of China

Fax: (+86 451 8667 3647)

E-mail: fuhg@vip.sina.com; fuhg@hlju.edu.cn; chunguitianhq@163.com

## Supporting Information

### 1. Experimental section

#### 1.1. Materials

Ni(NO<sub>3</sub>)<sub>2</sub>, ethylene glycol (EG), Sodium borohydride (NaBH<sub>4</sub>) were purchased from Tianjin Kermel Chemical Reagent Co. Ltd. Co(NO<sub>3</sub>)<sub>2</sub>·6H<sub>2</sub>O, P-nitrophenol (C<sub>6</sub>H<sub>5</sub>NO<sub>3</sub>) and 2-methylimidazole were purchased from Aladdin Ltd. CO(NH<sub>2</sub>)<sub>2</sub>, methanol were purchased from Tianjin GuangFu Fine Chemical Research Institute, and all were used without further purification.

#### 1.2. The preparation for Ni(OH)<sub>2</sub> nanosheets

The Ni(OH)<sub>2</sub> nanosheets were prepared by a hydrothermal procedure reported by Sun et al.<sup>1</sup> Briefly, 0.524 g of Ni(NO<sub>3</sub>)<sub>2</sub>·6H<sub>2</sub>O and 0.216g CO(NH<sub>2</sub>)<sub>2</sub> were dissolved in a 40 mL mixture of 16 mL deionized water and 24 mL ethylene glycol. After 20 min of vigorous stirring at ambient temperature, the as-prepared solution was transferred into Teflon-lined autoclave. The autoclave was sealed and heated up to 140 °C for 4 h. Afterward the system was allowed to cool down to room temperature, the light green products were collected by centrifugation and washing several times with deionized water and ethanol, then dried at 60 °C overnight for further use.

#### 1.3. Synthesis of ZIF-67/Ni(OH)<sub>2</sub>

The ZIF-67/Ni(OH)<sub>2</sub> were prepared in aqueous solution at room temperature. Typically, Ni(OH)<sub>2</sub> (0.151 g) was dispersed in the binary mixture of 10mL methanol and 10 mL ethanol. Co(NO<sub>3</sub>)<sub>2</sub>·6H<sub>2</sub>O (0.146 g) was dissolved in other binary mixture of 4 mL methanol and 4 mL ethanol. 2-methylimidazole (0.164 g) was dissolved in another mixture of 4 mL methanol and 4 mL ethanol. After Co(NO<sub>3</sub>)<sub>2</sub>·6H<sub>2</sub>O solution was added into Ni(OH)<sub>2</sub> solution with the assistance of sonication, the 2-methylimidazole solution was quickly poured into the pink solution. The reaction was performed for 24 h at room temperature. The precipitate was isolated from the solution by centrifugation at 4000 rpm for 5 min, and rinsed with methanol for three times, and finally dried at 60°C. The final product was designated as ZN-1. When the mole ratio of Co(NO<sub>3</sub>)<sub>2</sub>·6H<sub>2</sub>O and Ni(OH)<sub>2</sub> were 0.5/3, 2/3, and 3/3, the final products were

designated as ZN-0.5, ZN-2, ZN-3, respectively.

#### **1.4. Synthesis 2-D Ni<sub>3</sub>N-Co<sub>3</sub>N hybrids**

The as-prepared ZIF-67/Ni(OH)<sub>2</sub> precursors were loaded in porcelain boats, and then heated to 350 °C for 3 h with a heating rate of 2 °C min<sup>-1</sup> under NH<sub>3</sub> atmosphere and then cooled to room temperature, and Ni<sub>3</sub>N-Co<sub>3</sub>N was obtained. ZN-1 was also calcined at 300, 400, and 450 °C under a NH<sub>3</sub> atmosphere to tune the structures of the samples. The samples were named ZN-1-300, ZN-1-400, and ZN-1-450 respectively.

#### **1.5. Characterization**

Scanning electron microscopy (SEM, Hitachi SU-70) was used to characterize the morphologies, and Transmission electron microscopy (TEM, JEM-2100) was further detect the crystalline structures. Powder X-ray diffraction (XRD) patterns were obtained on a Bruker D8 X-ray diffractometer (Cu K $\alpha$  radiation,  $\lambda = 1.5406 \text{ \AA}$ ). Raman spectra was collected by using a Jobin Yvon HR 800 micro-Raman spectrometer with a 457.9 nm laser as excitation source. An X-ray photoelectron spectra (XPS) was conducted on VG ESCALAB MK II using an Mg Ka (1253.6 eV) achromatic X-ray radiation. N<sub>2</sub> adsorption-desorption experiments were performed on a Micromeritics Tristar II) instrument. Fourier transform infrared spectrum was measured from a NICOLETIS10 spectrometer.

#### **1.6. Catalytic hydrogenation reaction of p-nitrophenol**

Catalytic hydrogenation reaction of p-NP in the presence of excess NaBH<sub>4</sub> was conducted in aqueous solution atmospheric pressure and 15°C, 25°C, 35°C, 45°C. In a typical experiment, the catalytic hydrogenation reaction of PNP to PAP was conducted in a 250 mL three-necked round-bottomed flask with 0.3 mM 80 mL PNP aqueous solution, and the solution was mechanically stirred with impeller. After 0.4 M 10 mL freshly prepared NaBH<sub>4</sub> aqueous solution was injected into 80 mL of PNP solution, the color of solution changed from light yellow to bright yellow.<sup>2</sup> Subsequently, 6 mL dispersed catalyst (3 mg) solution was added and the solution was stirred. The reaction progress was

evaluated by taking a small portion of the reaction mixture every minute and measuring the UV–vis spectra on UV-1600/1800B. After the reaction, the catalyst can be easily removed from the solution phase under an external magnetic field, washed with water and then reused 10 times in succession under the same reaction conditions.

**1.7. TOF:** molecules of 4-NP converted per quality of Ni<sub>3</sub>N-Co<sub>3</sub>N per second.

$$\begin{aligned} TOF_{Ni_3N-Co_3N} &= \frac{CVN_A}{mt} \\ &= \frac{0.3mM \times 10^{-3} \times 80mL \times 10^{-3} \times 6.02 \times 10^{23}}{3mg \times 10^{-3} \times 239s} \\ &= 2.02 \times 10^{19} \text{ molecule g}^{-1}\text{s}^{-1} \end{aligned}$$

$$\begin{aligned} TOF_{Ni_3N} &= \frac{CVN_A}{mt} \\ &= \frac{0.3mM \times 10^{-3} \times 80mL \times 10^{-3} \times 6.02 \times 10^{23}}{3mg \times 10^{-3} \times 492s} \\ &= 9.79 \times 10^{18} \text{ molecule g}^{-1}\text{s}^{-1} \end{aligned}$$

$$\begin{aligned} TOF_{ZIF-67-350} &= \frac{CVN_A}{mt} \\ &= \frac{0.3mM \times 10^{-3} \times 80mL \times 10^{-3} \times 6.02 \times 10^{23}}{3mg \times 10^{-3} \times 1944s} \\ &= 2.48 \times 10^{18} \text{ molecule g}^{-1}\text{s}^{-1} \end{aligned}$$

C: Concentration of PNP, V: Volume of PNP, m: Quality of catalyst, t: Reaction time, N<sub>A</sub>: 6.02 × 10<sup>23</sup>.

### 1.8. Electrochemical measurements

The electrochemical measurement was performed with a BAS100B electrochemical workstation in a typical three-electrode system at ambient temperature, with Ag/AgCl electrode (saturated KCl-filled) as reference electrode, glassy carbon electrode (GCE, 0.07065 cm<sup>2</sup> of area) as work

electrode and graphite rod electrode as counter electrode, and 1 M KOH was used as electrolyte. All the potentials recorded with respect to the reversible hydrogen electrode (RHE) on the basis of the Nernst equation without  $iR$  correction:  $E_{vsRHE} = E_{vsAg/AgCl} + 0.207 + 0.059 \text{ pH}$ .<sup>3</sup> Catalyst ink was typically made by dispersing 5 mg of catalyst and 0.5 mg carbon black in 1 mL ethanol/water mixture (v/v=1:1). Then a total of 10  $\mu\text{L}$  of the catalysis slurry was dropped onto the surface of the bare GCE. The activity of  $\text{Ni}_3\text{N-Co}_3\text{N}$  toward the HER was examined by linear sweep voltammetry (LSV) with a scan rate of  $5\text{mVs}^{-1}$ . The stability test was obtained by cyclic voltammetry (CV) scanning of 2000 and 4000 cycles with a scan rate of  $100\text{mVs}^{-1}$ .

## Figure captions

**Figure S1.** a-d) SEM images of ZN-0.5, ZN-1, ZN-2, ZN-3. Inset: SEM images of ZN-1, ZN-2, ZN-3. e-f) TEM images of ZN-1. g-h) higher magnified TEM images of ZN-1. i-l) photos of Ni(OH)<sub>2</sub>, ZN-1, ZIF-67, ZN-1-350.

**Figure S2.** N<sub>2</sub> adsorption-desorption isotherms of (a) ZIF-67, ZN-1, Ni(OH)<sub>2</sub> and b) Ni<sub>3</sub>N-Co<sub>3</sub>N (ZN-1-350).

**Figure S3.** a-b) Raman spectras of the Ni<sub>3</sub>N-Co<sub>3</sub>N, Ni<sub>3</sub>N, ZIF-67, ZIF-67 after calcination in NH<sub>3</sub> (ZIF-67-350).

**Figure S4.** a-b) SEM images of ZN-1-350, Ni(OH)<sub>2</sub>-350.

**Figure S5.** XPS spectra of ZN-1-350. a) wide scan spectrum and the high-resolution spectra of b) Ni 2p c) Co 2p d) N1s.

**Figure S6.** a) Co XPS spectra of ZIF-67-350. b) Co XPS spectra of ZIF-67. c) Ni XPS spectra of Ni(OH)<sub>2</sub>-350. d) N XPS spectra of Ni(OH)<sub>2</sub>-350.

**Figure S7.** a) XRD pattern of as synthesized ZIF-67 and ZIF-67-350. b) SEM image of ZIF-67-350. c-d) XRD pattern and SEM image of 20mgZIF-67/10mgNi(OH)<sub>2</sub>-350. e-f) XRD pattern and SEM image of 20mg Ni(OH)<sub>2</sub>/10mg Ni(OH)<sub>2</sub>-350.

**Figure S8.** a) XRD pattern of the ZN-1-300, ZIF-67. b) XRD pattern of the as synthesized ZN-1-400. c-d) SEM images of ZN-1-300, ZN-1-400.

**Figure S9.** a) UV-vis absorption spectra of p-NP catalyzed by Ni<sub>3</sub>N catalyst at 25 °C. b) UV-vis absorption spectra of p-NP catalyzed by ZIF-67-350 catalyst at 25°C.

**Figure S10.** a-c) UV-vis absorption spectra of p-NP catalyzed by Ni<sub>3</sub>N-Co<sub>3</sub>N catalyst at 15°C, 35°C, 45°C.

**Figure S11.** a-b) UV-vis absorption spectra of p-NP catalyzed by ZN-2-350, ZN-0.5-350. c) Pseudo-first-order plot of ln (C/C<sub>0</sub>) against reaction time on ZN-0.5-350, ZN-1-350 and ZN-2-350 at 25°C. d)  $k_{app}$  of different catalysts at 25°C.

**Figure S12.** Magnetic hysteresis loop of Ni<sub>3</sub>N-Co<sub>3</sub>N catalyst at the temperature of

300K. The inset shows the enlargement of M–H loop at low magnetic field and the illustration of magnetic separation by an external magnet.

**Figure S13.** a) Polarization curves for ZIF-67-350, Ni(OH)<sub>2</sub>-350, ZN-1-350, and Pt/C in 1M KOH with a scan rate of 5 mVs<sup>-1</sup>. b) Tafel plots for ZIF-67-350, Ni(OH)<sub>2</sub>-350, ZN-1-350 and Pt/C. c) Nyquist plots of ZIF-67-350, Ni(OH)<sub>2</sub>-350, and ZN-1-350. The inset in (c) is the Nyquist plots for the high frequency region. d) Polarization data for the ZN-1-350 sample in 1M KOH initially and after 2000, and 4000 CV sweeps between -1000 mV and -1800 mV vs RHE. The inset in (d) is the time dependence of the current density for ZN-1-350 under the temporal evolution of the potential required to maintain 10 mA cm<sup>-2</sup> for 24h.

**Figure S14.** a-c) CVs for ZIF-67-350, Ni(OH)<sub>2</sub>-350, ZN-1-350 with different rates from 40 to 200 mVs<sup>-1</sup>. The inset in (a-c) is the capacitive current at 0.21 V as a function of scan rate for ZIF-67-350( $j_0 = j_a - j_c$ ), Ni(OH)<sub>2</sub>-350( $j_0 = j_a - j_c$ ), ZN-1-350( $j_0 = j_a - j_c$ ). d) Exchange current density of ZIF-67-350, Ni(OH)<sub>2</sub>-350, ZN-1-350 composites.

**Figure S15.** a) Polarization data for ZIF-67/Ni(OH)<sub>2</sub> calcined in different temperatures. b) Polarization data for different ratio ZIF-67/Ni(OH)<sub>2</sub> calcined at 350°C. c) Tafel plots for ZN-1-300, ZN-1-350, ZN-1-400, ZN-1-450. d) Tafel plots for ZN-0.5-350, ZN-1-350, ZN-2-350, ZN-3-350.

**Figure S16.** a) CVs of Ni(OH)<sub>2</sub>-350, ZIF-67-350, ZN-1-350 in 1 M PBS with a scan rate of 50 mVs<sup>-1</sup>. b) Calculated TOF for Ni(OH)<sub>2</sub>-350, ZIF-67-350, ZN-1-350 in 1 M KOH.

**Table S1** The samples and their corresponding synthesis parameters.

**Table S2** Rate constants of the reduction of p-nitrophenol to p-aminophenol by metal catalysts.

**Table S3** The performance of different catalysts for HER.

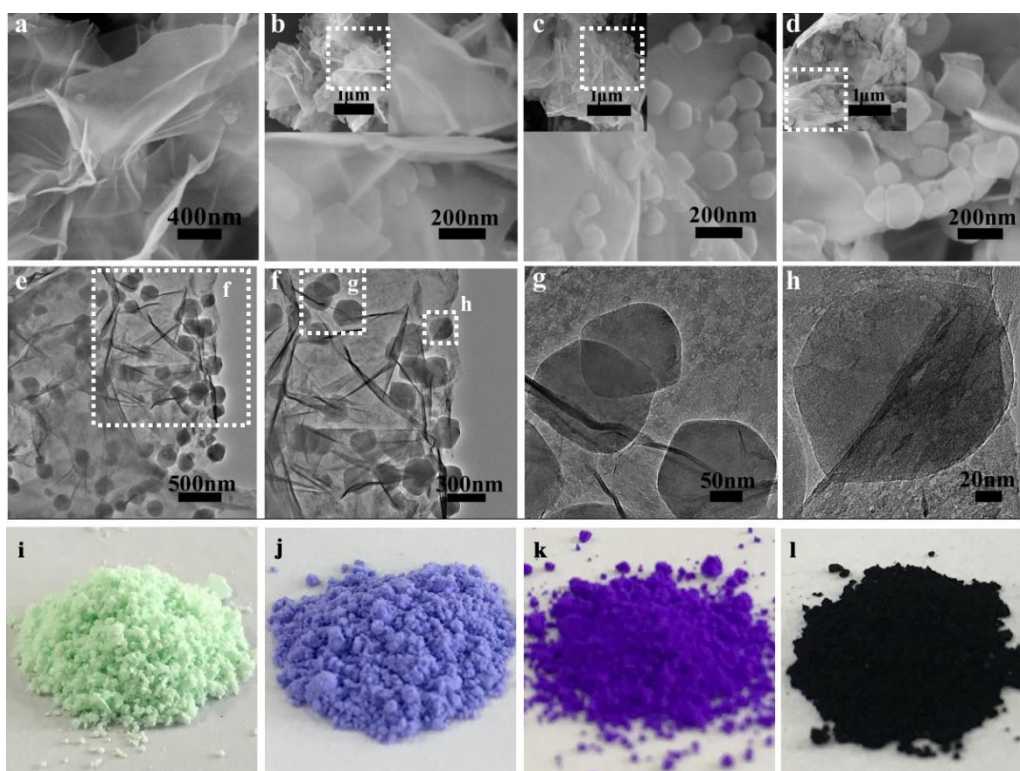

**Figure S1.** a-d) SEM images of ZN-0.5, ZN-1, ZN-2, ZN-3. Inset: SEM images of ZN-1, ZN-2, ZN-3. e-f) TEM images of ZN-1. g-h) higher magnified TEM images of ZN-1. i-l) photos of Ni(OH)<sub>2</sub>, ZN-1, ZIF-67, ZN-1-350.

As shown in Figure S1a-d, the ZIF-67 polyhedrals were integrated on the surface of the Ni(OH)<sub>2</sub> nanosheets. Also, with the increase in the mole ratio of cobalt and nickel, the polyhedrons on the nanosheets also gradually increased.

**The description about IR and Raman spectra:** The FTIR spectra of Ni(OH)<sub>2</sub>, ZIF-67 and ZN-1 are shown in Fig. 1i. In the ZN-1 IR spectra, the discernible peaks at 422 cm<sup>-1</sup> and 992 cm<sup>-1</sup> correspond to the stretching modes of Co-N and C-N of ZIF-67, respectively. Furthermore, the two bands at around 627 cm<sup>-1</sup> and 484 cm<sup>-1</sup> are ascribed to the  $\delta$  OH and  $\nu$  Ni - OH vibrations of Ni(OH)<sub>2</sub>, respectively. Raman spectroscopy has also shown the presence of characteristic peaks of ZIF-67 in ZN-1.



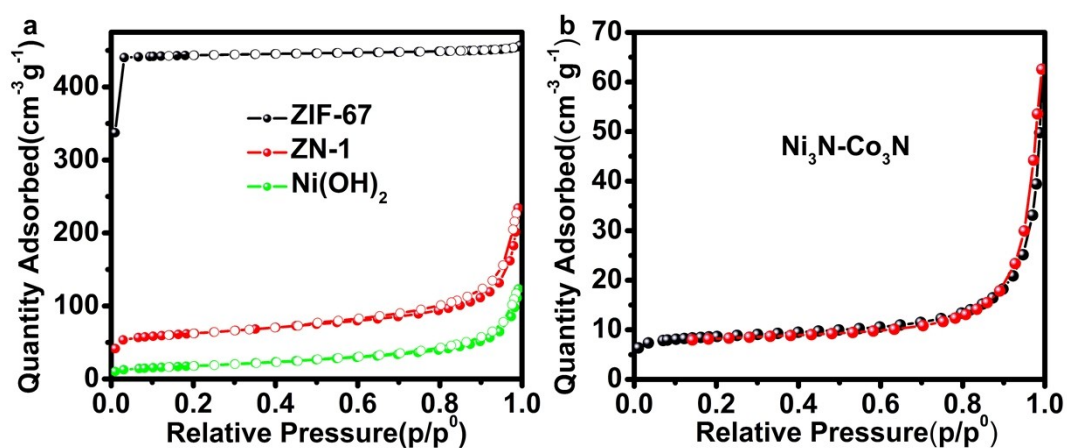

**Figure S2.** N<sub>2</sub> adsorption-desorption isotherms of a) ZIF-67, ZN-1, Ni(OH)<sub>2</sub> and b) Ni<sub>3</sub>N-Co<sub>3</sub>N (ZN-1-350).

The N<sub>2</sub> adsorption/desorption test shows that the S<sub>BET</sub> values of ZN-1 (216.11 m<sup>2</sup>g<sup>-1</sup>) is between Ni(OH)<sub>2</sub> (64.14 m<sup>2</sup>g<sup>-1</sup>) and ZIF-67 (1507.83 m<sup>2</sup>g<sup>-1</sup>), indicating that the combination of ZIF-67 and Ni(OH)<sub>2</sub> has low specific surface area. The curve shows a strong N<sub>2</sub> adsorption in the low pressure region and a distinct hysteresis in the high pressure region, implying coexistence of meso-/macropores and micropores. This clearly demonstrates the successful combination of Ni(OH)<sub>2</sub> and ZIF-67.<sup>4</sup> Figure S2b is the N<sub>2</sub> adsorption-desorption isotherm of Ni<sub>3</sub>N-Co<sub>3</sub>N (ZN-1-350) hybrids. The specific surface area of Ni<sub>3</sub>N-Co<sub>3</sub>N is 30.02 m<sup>2</sup> g<sup>-1</sup>.

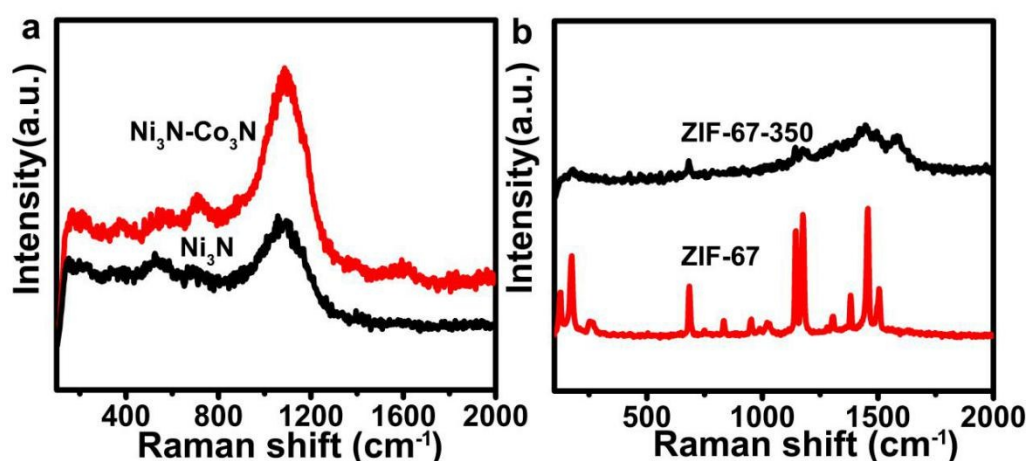

**Figure S3.** a-b) Raman spectras of the Ni<sub>3</sub>N-Co<sub>3</sub>N, Ni<sub>3</sub>N, ZIF-67, ZIF-67 after calcination in NH<sub>3</sub> (ZIF-67-350).

In Figure S3a, the obvious peak located at  $702\text{ cm}^{-1}$  is identified for metal-N bond in the spectrum of  $\text{Ni}_3\text{N-Co}_3\text{N}$ .<sup>5</sup> The peaks corresponding to metal-O can also be observed at  $1110\text{ cm}^{-1}$  and  $521\text{ cm}^{-1}$ , which should be ascribed the surface oxidation of nitrides under air.<sup>6</sup> The Raman spectrum is also similar to  $\text{Ni}_3\text{N}$  derived from  $\text{Ni}(\text{OH})_2$ , further indicating the formation of nitrides in ZN-1-350. In Figure S3b, it can be clearly observed that ZIF-67 did not change its peak position before and after calcination, which reflected the role of  $\text{Ni}(\text{OH})_2$  in promoting transformation.

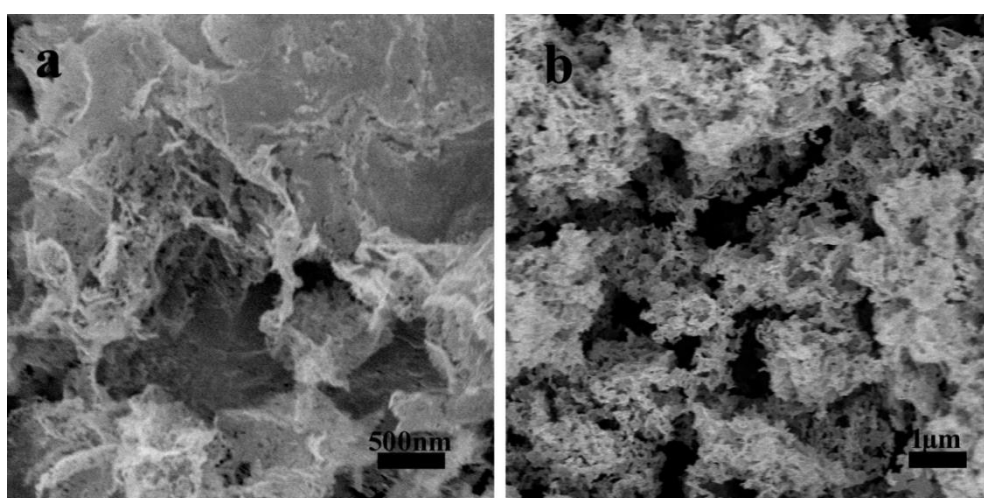

**Figure S4.** a-b) SEM images of ZN-1-350,  $\text{Ni}(\text{OH})_2$ -350.

Figure S4a shows the SEM image of ZN-1-350 from calcining ZIF-67/ $\text{Ni}(\text{OH})_2$  precursor under  $\text{NH}_3$  at  $350^\circ\text{C}$  3h. The samples shows well sheet-like structure, being consistent with the TEM result. Figure S4b shows SEM image of  $\text{Ni}_3\text{N}$  derived from  $\text{Ni}(\text{OH})_2$  after calcination in  $\text{NH}_3$  at  $350^\circ\text{C}$  for 3h. We can see that the morphology of  $\text{Ni}(\text{OH})_2$  after calcination was destroyed. So, it is obvious that the ZIF-67 can act as a "baffle" to prevent the aggregation of 2-D  $\text{Ni}(\text{OH})_2$  during the nitridation.

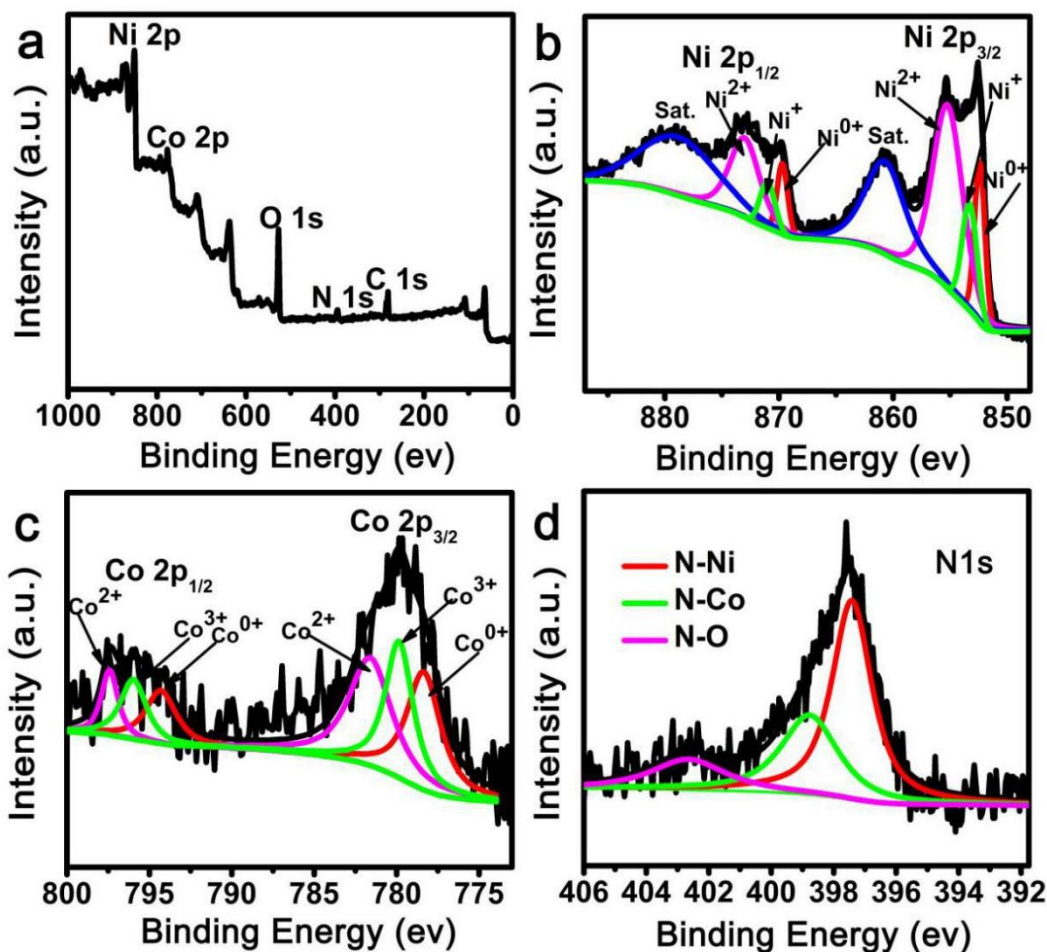

**Figure S5.** XPS spectra of ZN-1-350. a) wide scan spectrum and the high-resolution spectra of b) Ni 2p c) Co 2p d) N1s

The wide XPS spectra of  $\text{Ni}_3\text{N-Co}_3\text{N}$  nanosheets was shown in Figure S5a, which indicates that Ni, Co, C, N, O elements were observed. XPS analysis indicates that Co exists on the surface of the sample after calcination. According to previous literature, the peaks located at 853.2 eV, 871 eV can be ascribed to  $\text{Ni } 2p_{3/2}$ , and  $\text{Ni } 2p_{1/2}$  in  $\text{Ni}_3\text{N}$ ,<sup>7</sup> and the peaks located at 852.4 eV and 869.7 eV can be assigned to  $\text{Ni}^{0+}$ .<sup>8</sup> Meanwhile, the peaks at 855.2 eV, 860.7 eV, 873 eV and 878.8 eV can be ascribed to  $\text{Ni } 2p_{3/2}$ ,  $\text{Ni } 2p_{1/2}$  and Ni satellite peaks in  $\text{NiO}$ ,<sup>8,9</sup> which demonstrates the existence of surface oxidation in  $\text{Ni}_3\text{N}$  nanosheets. However, the  $\text{NiO}$  still couldn't be detected by XRD, giving the evidence that the major phase was  $\text{Ni}_3\text{N}$  with some surface oxidized layers. Compared to Ni 2p in pure nickel nitride, the overall peak shifts toward low binding energy (Figure S6c). The Co 2p XPS spectrum (Figure S5c)

displays two peaks at 778.3 and 794.3 eV corresponding to the  $2p_{3/2}$  and  $2p_{1/2}$  peaks of metal cobalt in  $\text{Co}_3\text{N}$ .<sup>7,10</sup> Deconvolution of the spectrum reveals the existence of  $\text{Co}^{3+}$  with the spin-orbit doublets at 779.8 and 795.9 eV, which can be ascribed to  $\text{Co-N}$ .<sup>10,11</sup>  $\text{Co}^{2+}$  with the spin-orbit doublets is at 781.6 and 797.4 eV.<sup>12</sup> This is due to the surface oxidization of metallic Co in the  $\text{Ni}_3\text{N-Co}_3\text{N}$ .<sup>12</sup> However, the cobalt in pure ZIF-67-350 is only present in the  $\text{Co}^{2+}$ , as shown in Figure S6a, which is the same as the existing form of cobalt in pure ZIF-67 (Figure S6b). This further proves that the presence of  $\text{Ni}(\text{OH})_2$  accelerates the decomposition of ZIF-67. The binding energy of N 1s in  $\text{Ni}_3\text{N-Co}_3\text{N}$  is 397.4, 398.7, and 402.5, which are the peaks of N-Ni,<sup>13</sup> N-Co,<sup>14</sup> and N-O.<sup>15</sup>

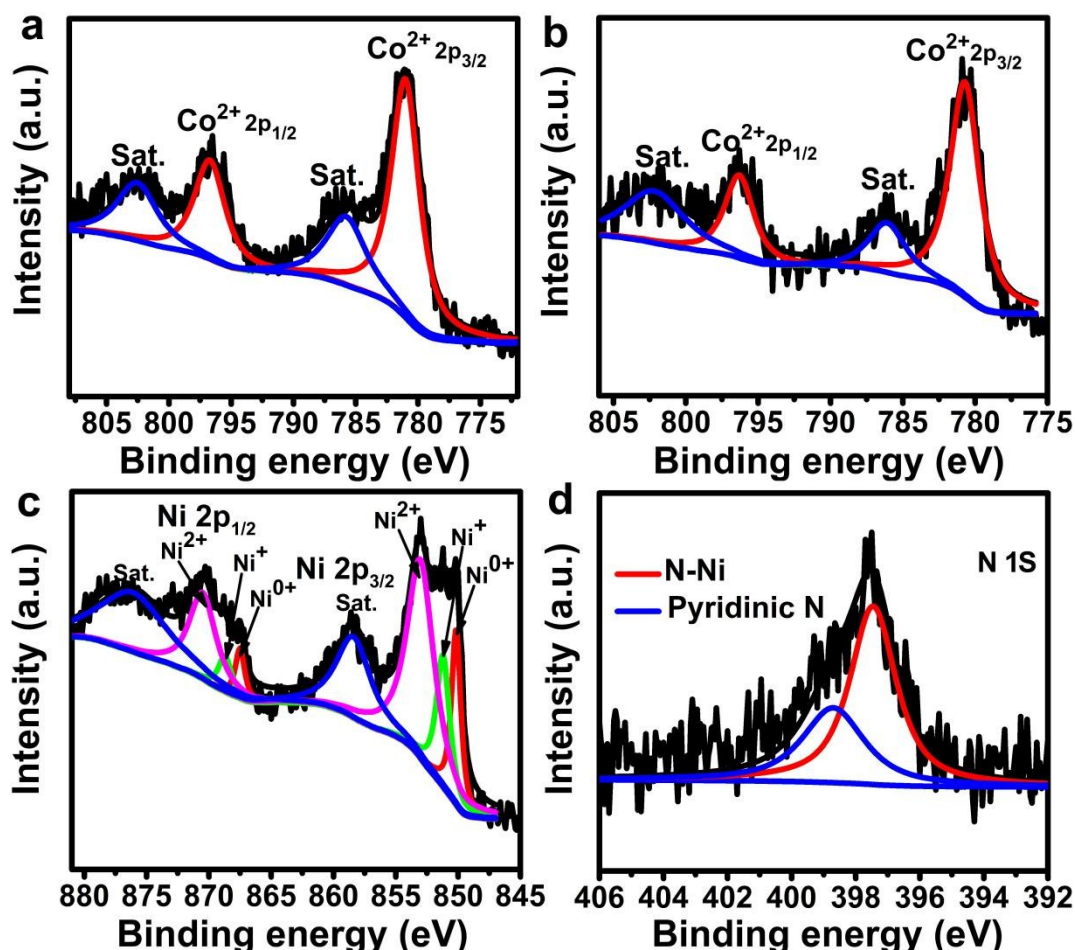

**Figure S6.** a) Co XPS spectra of ZIF-67-350. b) Co XPS spectra of ZIF-67. c) Ni XPS spectra of  $\text{Ni}(\text{OH})_2$ -350. d) N XPS spectra of  $\text{Ni}(\text{OH})_2$ -350.

As shown in Figure S6a, the fitting data reveal two peaks ( $2p_{3/2}$  peak at 781.0 and  $2p_{1/2}$  peak at 796.7 eV) corresponding to  $\text{Co}^{2+}$ .<sup>12</sup> In Figure S6b, it can be seen that main peaks of Co  $2p_{3/2}$  and Co $2p_{1/2}$  located at binding energies of 779.6 and 795.1 eV, respectively.<sup>12</sup> As shown in the Figure S6c, the nickel in  $\text{Ni}_3\text{N}$  can also be divided into the peaks corresponding to  $\text{Ni}^0$ ,  $\text{Ni}^+$ ,  $\text{Ni}^{2+}$ . As shown in the Figure S6d, N can only be divided into two peaks, corresponding to Ni-N and pyridinic N.<sup>13</sup>

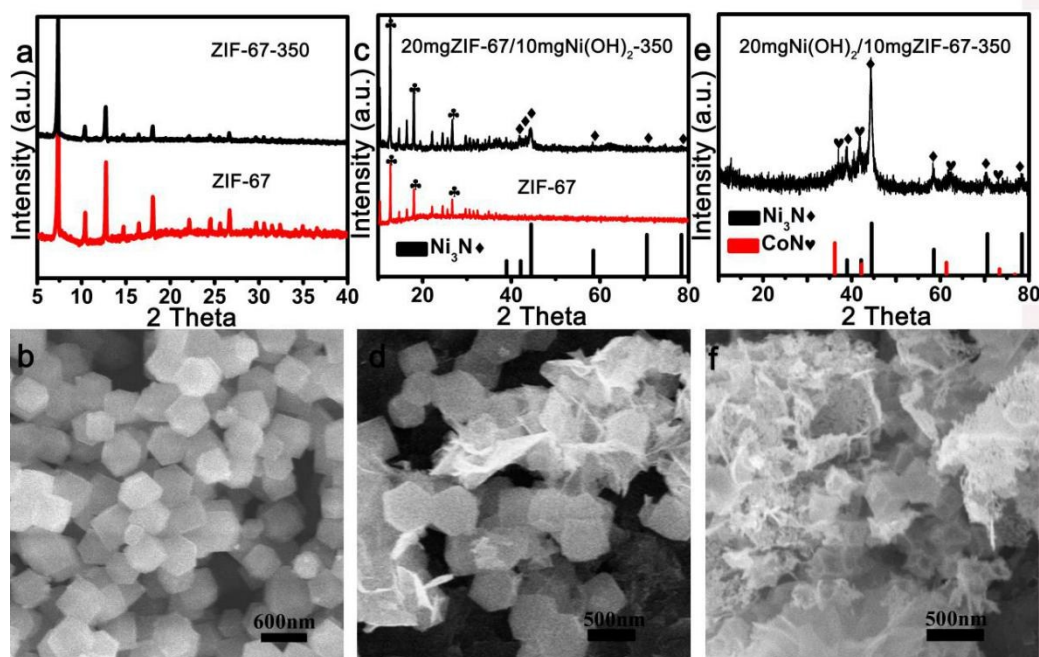

**Figure S7.** a) XRD pattern of the as synthesized ZIF-67 and ZIF-67-350. b) SEM image of ZIF-67-350. c-d) XRD pattern and SEM image of 20mg ZIF-67/10mg $\text{Ni}(\text{OH})_2$ -350. e-f) XRD pattern and SEM image of 20mg  $\text{Ni}(\text{OH})_2$ /10mg  $\text{Ni}(\text{OH})_2$ -350.

Figure S7 gives the XRD pattern of ZIF-67 and ZIF-67-350. We can see that two samples show similar peaks. The SEM image of ZIF-67-350 have shown uniform polyhedron morphology, being similar to that of ZIF-67. The result indicates little change of ZIF-67 after calcination at 350 °C, as well as the promoted role of Ni species on the nitridation of ZIF-67.

To further verify the role of  $\text{Ni}(\text{OH})_2$ , the pre-synthesized ZIF-67 and  $\text{Ni}(\text{OH})_2$  are physically mixed with different mass ratio. It is obvious that the conversion of

ZIF-67 can be accelerated with the increase of amount of  $\text{Ni}(\text{OH})_2$ . For the sample composed of 20 mg ZIF-67 and 10 mg  $\text{Ni}(\text{OH})_2$ , the ZIF-67 retains its morphology and structure after calcination under  $\text{NH}_3$  for 3h. Nevertheless, the conversion of ZIF-67 into nitrides can be observed with the changing of the mass ratio of  $\text{Ni}(\text{OH})_2$  and ZIF-67 to 20mg/10mg. We can observe the presence of shrink polyhedron in SEM images (Figure S7f) and obvious diffraction of CoN. We speculated that  $\text{Ni}(\text{OH})_2$  in ZIF-67/ $\text{Ni}(\text{OH})_2$  will predominantly react with  $\text{NH}_3$  to give  $\text{Ni}_3\text{N}$ . The  $\text{Ni}_3\text{N}$  may act as “active center” to promote the reaction of ZIF-67 with  $\text{NH}_3$ . The promoted action may be similar to well-known “seed-growth” process, in which the pre-presented seeds (Ag, Au etc.) can make more easily reduction of post-added metal salts around the “seeds” [Ref. S1].

Ref. S1:

a) Y. Xia, Y. Xiong, B. Lim, and SE. Skrabalak, *Angew. Chem. Int. Ed.*, 2009, **48**, 60.

b) K. D. Gilroy, A. Ruditskiy, H. C. Peng, D. Qin, and Y. Xia, *Chem. Rev.*, 2016, **116**, 10414.

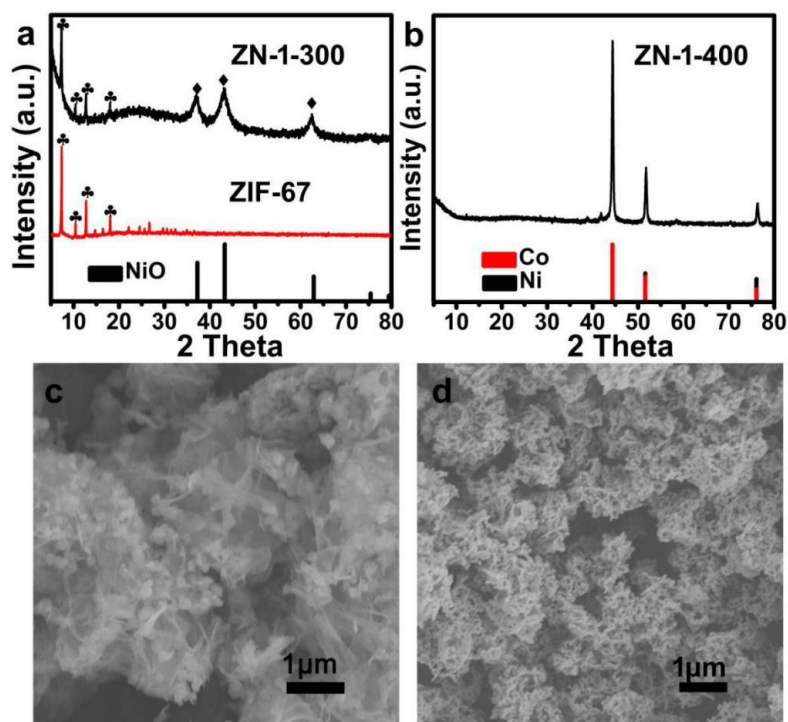

**Figure S8.** a) XRD pattern of the ZN-1-300, ZIF-67; b) XRD pattern of the as synthesized ZN-1-400. c-d) SEM images of ZN-1-300, ZN-1-400.

From Figure S8a, we can see that ZN-1-300 consists of NiO and ZIF-67. The SEM image shows the presence of polyhedron located on nanosheet (Figure S8c). The test indicates that low calcination temperature can not convert the precursor into 2-D nitride hybrids. As the temperature rises to 400 °C, the ZIF-67 can be decomposed and no polyhedron can be observed (Figure S8b, 8d). The results mean that the ZN-1 has no obvious change after nitridation at 300 °C, while it completely converted after nitridation at 400 °C for 3 h in combination with severe aggregation of the product in ZN-1-400. Thus, we selected the 350 °C as most suitable calcination temperature to obtain 2-D Ni<sub>3</sub>N-Co<sub>3</sub>N hybrids.

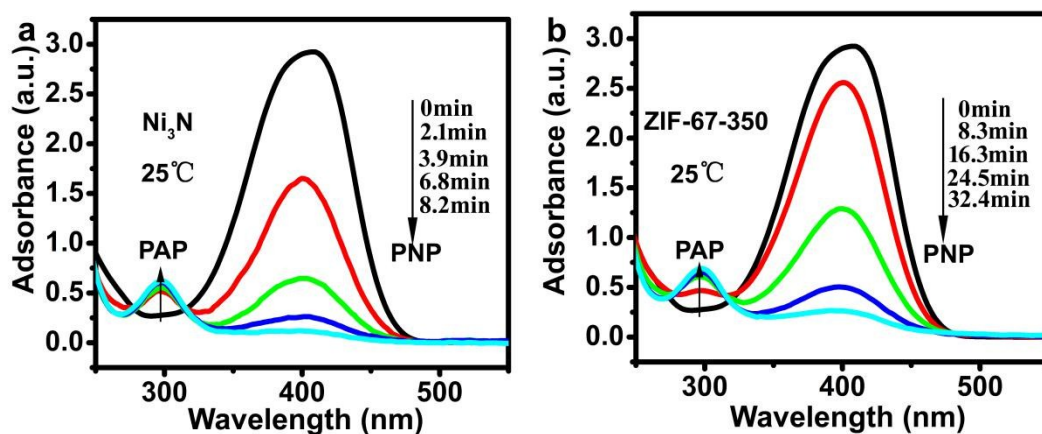

**Figure S9.** a) UV-vis absorption spectra of p-NP catalyzed by Ni<sub>3</sub>N catalyst at 25 °C. b) UV-vis absorption spectra of p-NP catalyzed by ZIF-67-350 catalyst at 25 °C.

Figure S9a is the UV-vis absorption spectra of p-NP catalyzed by Ni<sub>3</sub>N. Figure S9b is the UV-vis absorption spectra of p-NP catalyzed by ZIF-67-350. The conversion of p-NP to p-AP is complete in 8.2 min on Ni<sub>3</sub>N, and 32.4 min on ZIF-67-350. In contrast, the reduction is completed within 3.28 min on 2-D Ni<sub>3</sub>N-Co<sub>3</sub>N in same experimental conditions (Figure 3e). The comparison further indicates that ZN-1-350 is more active than Ni<sub>3</sub>N and ZIF-67-350.

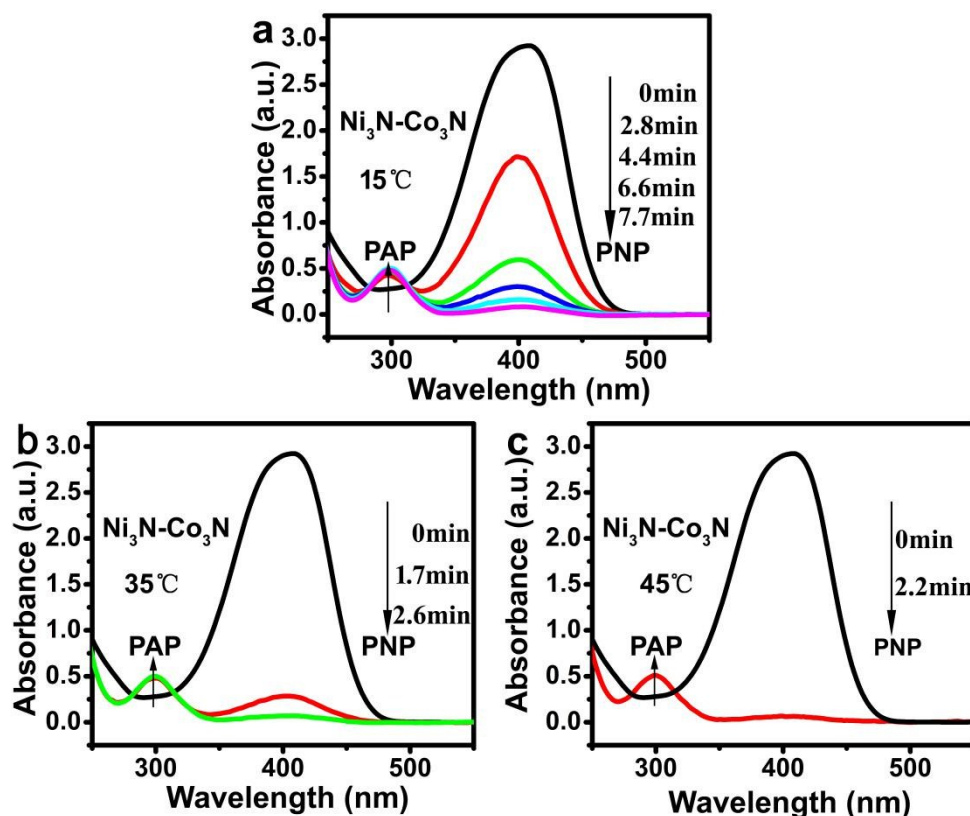

**Figure S10.** a-c) UV-vis absorption spectra of p-NP catalyzed by  $\text{Ni}_3\text{N-Co}_3\text{N}$  catalyst at 15°C, 35°C, 45°C.

The 2-D  $\text{Ni}_3\text{N-Co}_3\text{N}$  was chosen as typical sample to evaluate the effect of temperature on the reduction of p-NP since the reaction temperature is one of essential factors for the reduction of p-NP. The catalytic hydrogenation of p-NP over  $\text{Ni}_3\text{N-Co}_3\text{N}$  catalyst was carried out at four different temperatures ranging from 15 °C to 45 °C with an excessive amount of  $\text{NaBH}_4$  under ambient pressure. As shown in Figures S10a-c, the reaction time is further reduced as the reaction temperature increases. The reaction can almost be completed in 7.7 min at 15 °C, 3.98 min at 25 °C, 2.6 min at 35 °C and 2.2 min at 45 °C.



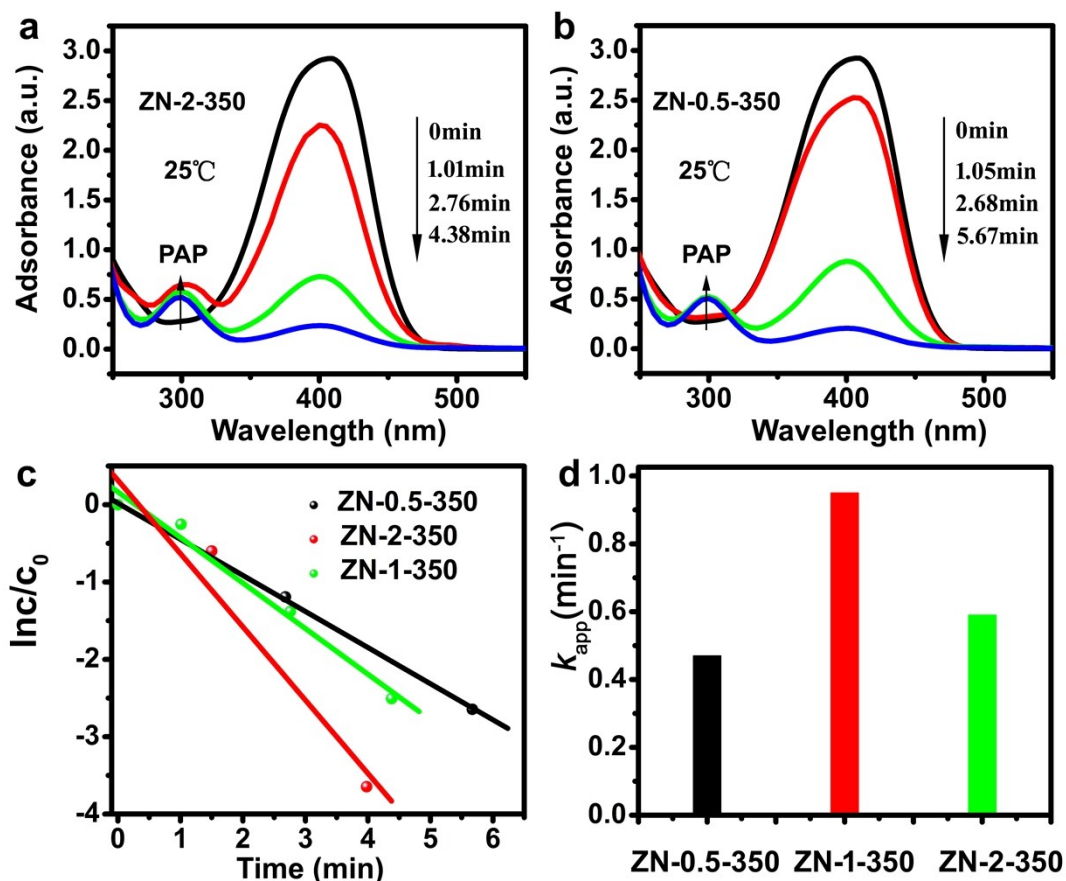

**Figure S11.** a-b) UV-vis absorption spectra of p-NP catalyzed by ZN-2-350, ZN-0.5-350. c) Pseudo-first-order plot of  $\ln(C/C_0)$  against reaction time on ZN-0.5-350, ZN-1-350 and ZN-2-350 at 25°C. d)  $k_{app}$  of different catalysts at 25°C.

Figure S11a and b show UV-vis absorption spectra of the solution of PNP in the presence of  $Ni_3N-Co_3N$  with different Co/Ni ratio at a certain time interval. This can be almost completed in 3.98 min, 4.38 min and 5.67 min on ZN-0.5-350, ZN-1-350 and ZN-2-350. We can see that all  $Ni_3N-Co_3N$  show better performance for the conversion than ZIF-67-350 and  $Ni_3N$  derived from  $Ni(OH)_2$  and the ZN-1-350 is the best one. Figure S11c shows the plot of  $\ln(C/C_0)$  against reaction time for the hydrogenation of PNP over different catalysts. The rate constants of ZN-0.5-350, ZN-1-350, ZN-2-350 were 0.47, 0.95, and 0.59 min<sup>-1</sup>, respectively. So, we can conclude that ZN-1-350 exhibited good catalytic activity, verifying that the suitable ratio is essential to give optimized performance.

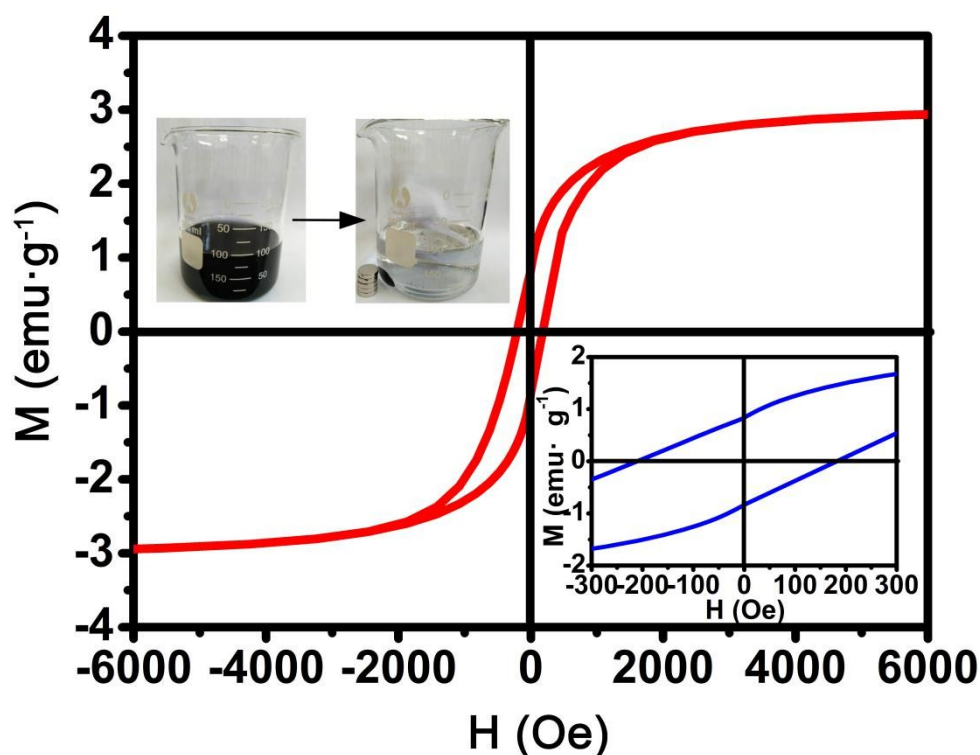

**Figure S12.** Magnetic hysteresis loop of 2-D  $\text{Ni}_3\text{N-Co}_3\text{N}$  catalyst at the temperature of 300K. The inset shows the enlargement of  $M$ - $H$  loop at low magnetic field and the illustration of magnetic separation by an external magnet.

The magnetic hysteresis of  $\text{Ni}_3\text{N-Co}_3\text{N}$  was measured by a vibrating sample magnetometer at 300 K in the applied magnetic field sweeping from  $-6000\text{Oe}$  to  $+6000\text{Oe}$ . As shown in Figure S12, the typical hysteresis loop of  $\text{Ni}_3\text{N-Co}_3\text{N}$  in its magnetic behavior shows the soft magnetic nature. The saturation magnetization value of  $\text{Ni}_3\text{N-Co}_3\text{N}$  was found at  $2.9 \text{ emu/g}$ , whereas the coercivity and retentivity values were  $208.7 \text{ kOe}$  and  $0.99 \text{ emu/g}$ , respectively. This suggests that  $\text{Ni}_3\text{N-Co}_3\text{N}$  catalyst is sufficient enough to be easily separated from the dispersion system under an external magnetic field (see the left insert of Figure S12).

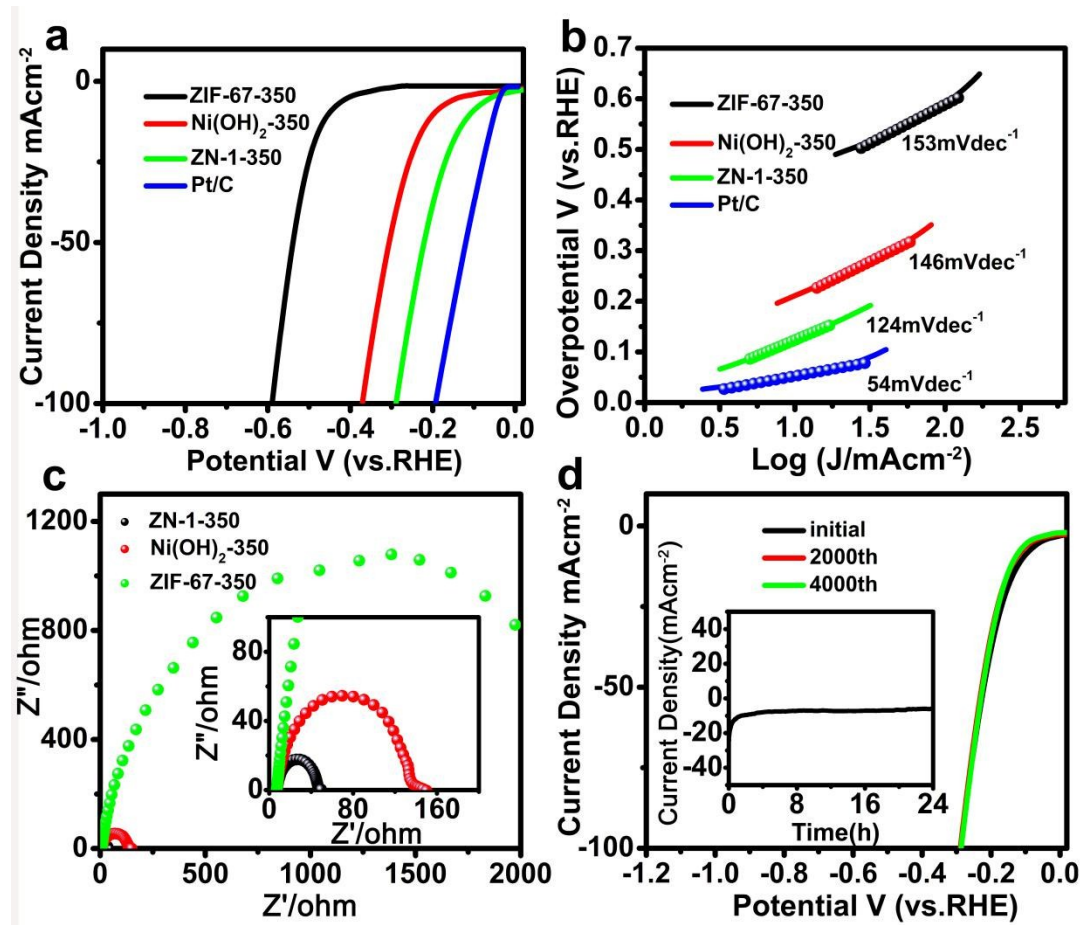

**Figure S13.** a) Polarization curves for ZIF-67-350, Ni(OH)<sub>2</sub>-350, ZN-1-350 and Pt/C in 1M KOH with a scan rate of 5 mVs<sup>-1</sup>. b) Tafel plots for ZIF-67-350, Ni(OH)<sub>2</sub>-350, ZN-1-350 and Pt/C. c) Nyquist plots of ZIF-67-350, Ni(OH)<sub>2</sub>-350, and ZN-1-350. The inset in (c) is the Nyquist plots for the high frequency region. d) Polarization data for the ZN-1-350 sample in 1M KOH initially and after 2000, and 4000 CV sweeps between -1000 and -1800mV vs RHE. The inset in (d) is the time dependence of the current density for ZN-1-350 under the temporal evolution of the potential required to maintain 10 mA cm<sup>-2</sup> for 24h.

Figure S13a shows the polarization curves without iR correction. For comparison, 2-D Ni<sub>3</sub>N-Co<sub>3</sub>N, Ni<sub>3</sub>N, ZIF-67-350 and commercial Pt/C catalyst were investigated under identical conditions. As expected, the Pt/C catalyst shows superior HER activity with negligible overpotential. The ZIF-67-350 was almost no obvious electrocatalytic activity. At the same time, Ni(OH)<sub>2</sub>-350 (Ni<sub>3</sub>N) also showed the poor activity. It is pleasing that the 2-D Ni<sub>3</sub>N-Co<sub>3</sub>N provides high catalytic activity. The

onset overpotential is about 43 mV, and the potential is about 109 mV to reach a current density of 10 mAcm<sup>-2</sup> ( $j_{10}$ ). The Ni<sub>3</sub>N derived from Ni(OH)<sub>2</sub> has an onset overpotential of 84 mV and  $j_{10}$  of 198 mAcm<sup>-2</sup>. Figure S13b presents the Tafel slopes of the samples derived from the polarization curves. The 2-D Ni<sub>3</sub>N-Co<sub>3</sub>N shows a Tafel slope of 126 (mVdec<sup>-1</sup>), which is smaller than both Ni(OH)<sub>2</sub>-350 (146 mVdec<sup>-1</sup>) and ZIF-67-350 (153 mV dec<sup>-1</sup>). The Tafel slope is determined by the rate limiting step associated with the catalyst reaction process, which indicating a HER route following the Volmer mechanism in basic medium.<sup>16</sup> Electrochemical impedance spectroscopy (EIS) technique was carried out to gain further insight into the nature of catalytic activity. Figure S13c shows the Nyquist plots over as-prepared materials. The ZN-1-350 shows the fastest electrocatalytic faradaic process, implying its superior HER kinetics. The long-term durability of the Ni<sub>3</sub>N-Co<sub>3</sub>N toward HER was further examined using carbon rod as the counter electrode. After continuous CV scanning for 2000 cycles and 4000 cycles in 1 M KOH with a scan rate of 100 mVs<sup>-1</sup>, the polarization curve showed negligible loss of current density compared with the original one, suggesting the good stability of 2-D Ni<sub>3</sub>N-Co<sub>3</sub>N in the long term electrochemical process. Furthermore, the long-term stability of 2-D Ni<sub>3</sub>N-Co<sub>3</sub>N was also evaluated by chronoamperometry. The catalyst was able to maintain its activity at least 24 h.

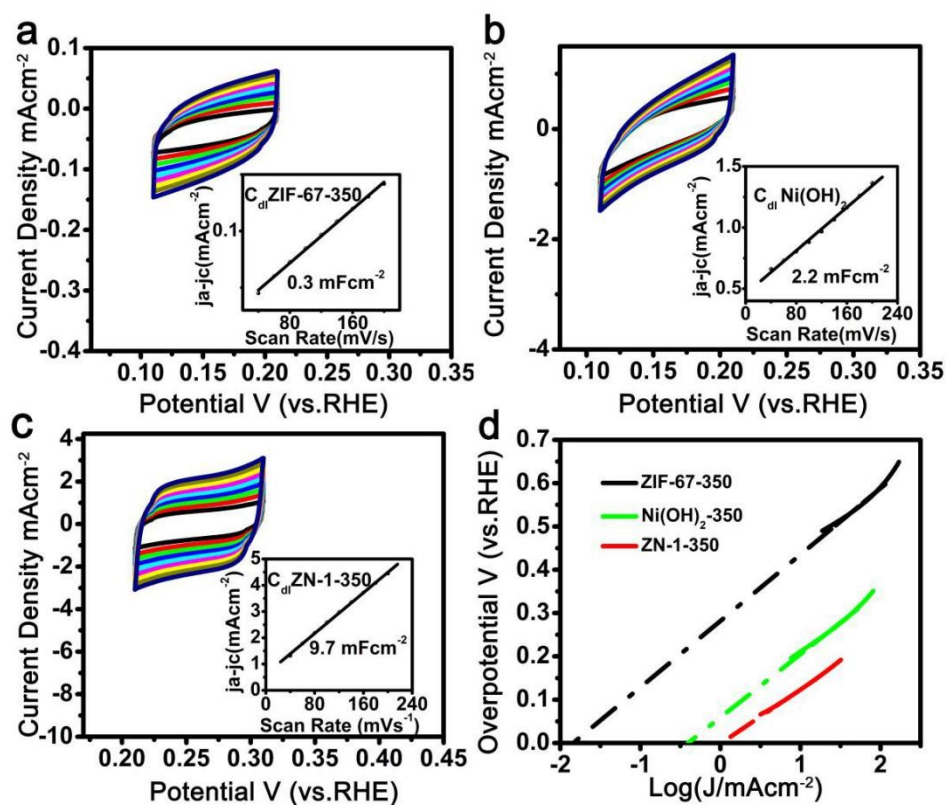

**Figure S14.** a-c) CVs for ZIF-67-350, Ni(OH)<sub>2</sub>-350, ZN-1-350 with different rates from 40 to 200 mVs<sup>-1</sup>. The inset in (a-c) is the capacitive current at 0.21 V as a function of scan rate for ZIF-67-350( $j_0 = j_a - j_c$ ), Ni(OH)<sub>2</sub>-350( $j_0 = j_a - j_c$ ), ZN-1-350( $j_0 = j_a - j_c$ ). d) Exchange current density of ZIF-67-350, Ni(OH)<sub>2</sub>-350, ZN-1-350 composites.

The electrochemical surface area (ECSAs), which is the ratio of the electric double layer capacitance ( $C_{dl}$ ), was used to further evaluate the catalytic properties. Based on the cyclic voltammograms (CVs) in the region of 0.2 V and 0.3 V, where the current response is only due to the charging of the double layer, the capacitances of 2-D Ni<sub>3</sub>N-Co<sub>3</sub>N, Ni<sub>3</sub>N, ZIF-67-350 are calculated to be 9.7, 2.2, and 0.3 mF cm<sup>-2</sup> respectively. The 2-D Ni<sub>3</sub>N-Co<sub>3</sub>N shows highest capacitance, revealing more catalytic active sites in 2-D Ni<sub>3</sub>N-Co<sub>3</sub>N. The exchange current density values of ZN-1-350 (2-D Ni<sub>3</sub>N-Co<sub>3</sub>N), Ni(OH)<sub>2</sub>-350, ZIF-67-350 are 1.03, 0.39, 0.014 mA cm<sup>-2</sup> (Figure S14d). The test further proves that ZN-1-350 has the large surface area, fast electron transmission, and favorable HER kinetic.<sup>16</sup>

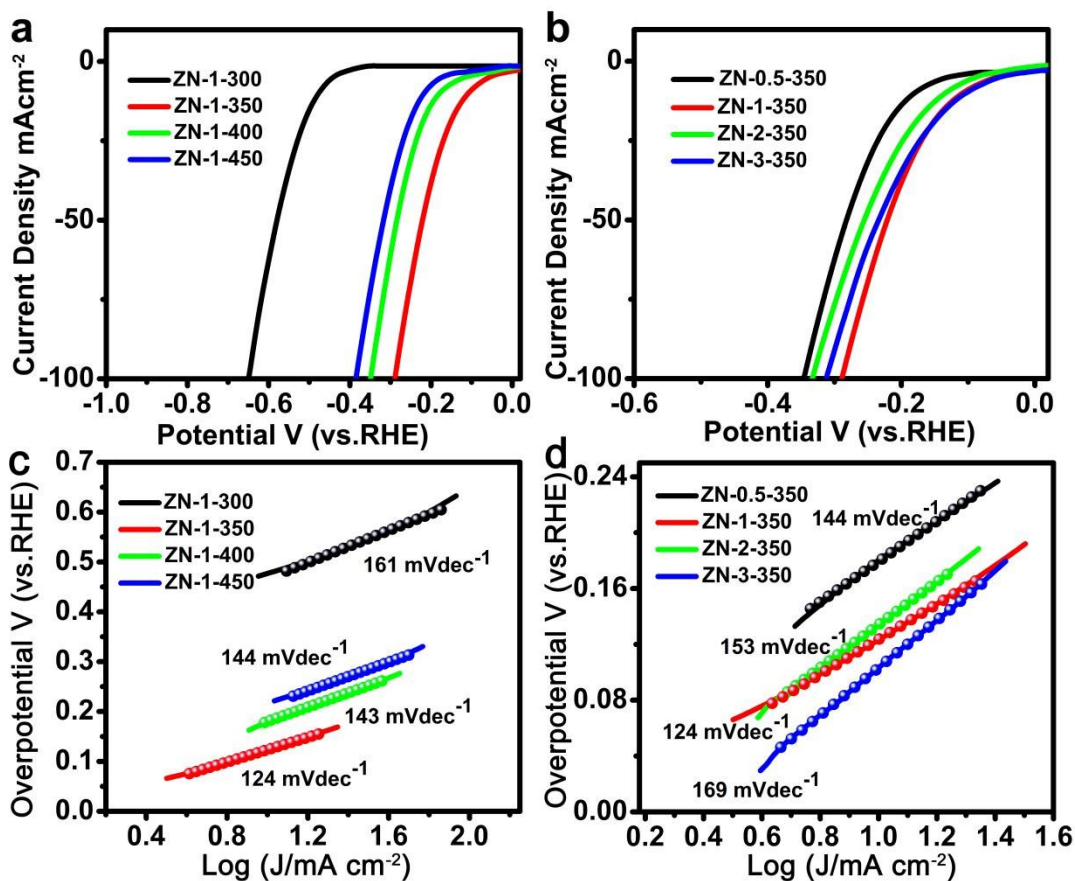

**Figure S15.** a) Polarization data for ZIF-67/Ni(OH)<sub>2</sub> calcined in different temperatures. b) Polarization data for different ratio ZIF-67/Ni(OH)<sub>2</sub> calcined at 350°C. c) Tafel plots for ZN-1-300, ZN-1-350, ZN-1-400, ZN-1-450. d) Tafel plots for ZN-0.5-350, ZN-1-350, ZN-2-350, ZN-3-350.

The polarization curves of ZN-1 at different calcining temperatures are shown in Figure S15a. The polarization curves for samples derived from the precursor with different ratio Co/Ni calcined at 350°C are shown in Figure S15b. The ZN-1-350 shows the best electrocatalytic activity. The good activity is relative with the sheet-like pore structure, which helps to expose more active centers. The presence of a pore structure allows the electrolyte to easily diffuse through the interface of the working electrode, therefore increasing current density and conversion efficiency.

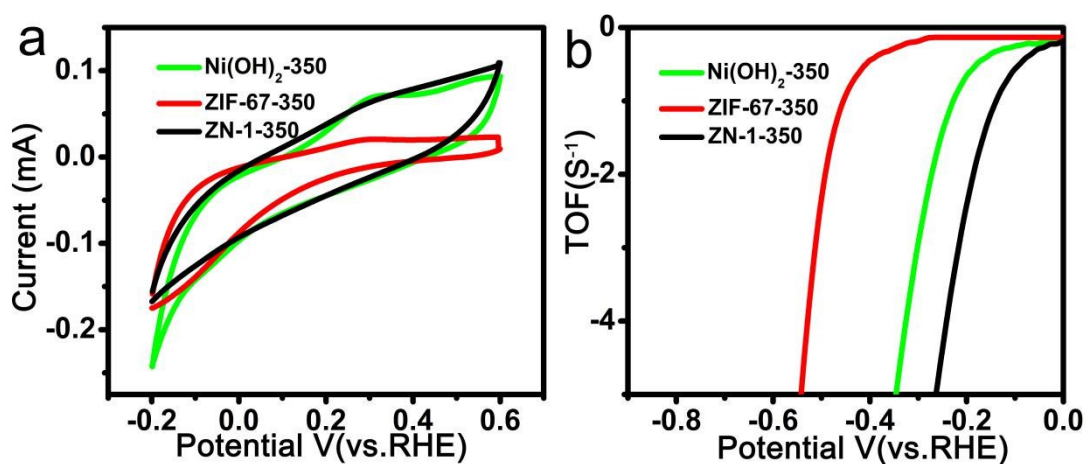

**Figure S16.** a) CVs of Ni(OH)<sub>2</sub>-350, ZIF-67-350, ZN-1-350 in 1 M PBS with a scan rate of 50 mVs<sup>-1</sup>. b) Calculated TOF for Ni(OH)<sub>2</sub>-350, ZIF-67-350, ZN-1-350 in 1 M KOH.

To better evaluate the performance of the catalyst, the turnover frequency (TOF) of HER normalized to the number of active sites was estimated as shown in Figure S15. The CV curves are in the region of -0.2 to 0.6 V vs RHE for ZN-1-350 in 1 M phosphate buffer solution (PBS). The ZN-1-350 also has the highest TOF value of 0.563s<sup>-1</sup> per site at overpotential of 100 mV, which is larger than that of Ni<sub>3</sub>N (0.253s<sup>-1</sup>) and ZIF-67-350 (0.135s<sup>-1</sup>).

**Table S1 The samples and their corresponding synthesis parameters**

| molar ratio<br>Co(NO <sub>3</sub> ) <sub>2</sub> :Ni(OH) <sub>2</sub> | Starting<br>material | Heating<br>atmosphere | Heating<br>temperature<br>(°C) | Heating<br>Time<br>(h) | Final<br>samples |
|-----------------------------------------------------------------------|----------------------|-----------------------|--------------------------------|------------------------|------------------|
| 1:3                                                                   | ZN-1                 | NH <sub>3</sub>       | 300                            | 3h                     | ZN-1-300         |
| <b>1:3</b>                                                            | <b>ZN-1</b>          | <b>NH<sub>3</sub></b> | <b>350</b>                     | <b>3h</b>              | <b>ZN-1-350</b>  |
| 1:3                                                                   | ZN-1                 | NH <sub>3</sub>       | 400                            | 3h                     | ZN-1-400         |
| 1:3                                                                   | ZN-1                 | NH <sub>3</sub>       | 450                            | 3h                     | ZN-1-450         |
| 3:3                                                                   | ZN-3                 | NH <sub>3</sub>       | 350                            | 3h                     | ZN-3-350         |
| 2:3                                                                   | ZN-2                 | NH <sub>3</sub>       | 350                            | 3h                     | ZN-2-350         |
| 0.5:3                                                                 | ZN-0.5               | NH <sub>3</sub>       | 350                            | 3h                     | ZN-0.5-350       |

**The samples and their corresponding synthesis parameters**

| Physical mixing<br>ZIF-67:Ni(OH) <sub>2</sub> | Starting<br>material                    | Heating<br>atmosphere | Heating<br>temperature<br>(°C) | Heating<br>Time<br>(h) | Final samples                                |
|-----------------------------------------------|-----------------------------------------|-----------------------|--------------------------------|------------------------|----------------------------------------------|
| 2:1                                           | 20mgZIF-67/10mg<br>Ni(OH) <sub>2</sub>  | NH <sub>3</sub>       | 350                            | 3h                     | 20mgZIF-67/10mg<br>Ni(OH) <sub>2</sub> -350  |
| 1:2                                           | 20mgNi(OH) <sub>2</sub> /10mg<br>ZIF-67 | NH <sub>3</sub>       | 350                            | 3h                     | 20mg Ni(OH) <sub>2</sub> /10mg<br>ZIF-67-350 |



**Table S2 Rate constants of the reduction of p-nitrophenol to p-aminophenol by metal catalysts**

| sample                               | p-NP (mM) | p-NP solution volume (mL) | Rate constant (min <sup>-1</sup> ) | Time (min) | Reaction condition | Ref.      |
|--------------------------------------|-----------|---------------------------|------------------------------------|------------|--------------------|-----------|
| ZN-1-350                             | 0.3       | 80                        | 0.93                               | 3.98       | 25°C               | This work |
| Ni <sub>0.22</sub> /CB               | 0.5       | 50                        | 0.597                              | 9          | 30°C               | 17        |
| Ni-Ca-Al <sub>2</sub> O <sub>3</sub> | 0.3       | 80                        | 0.17                               | 18         | 25°C               | 18        |
| Ag/TiO <sub>2</sub>                  | 0.166     | 20                        | 0.6                                | 4.67       | 25°C               | 19        |
| Ni Co alloy                          | 0.03      | 10                        | 0.07                               | 30         | 20°C               | 20        |
| Ag/PAN                               | 0.13      | 30                        | 0.085                              | 70         | R.T.               | 21        |
| Pt-Au-PDA/RGO                        | 0.1       | 2.7                       | 0.575                              | 5          | R.T.               | 22        |
| CNFs/AgNPs                           | 0.12      | 30                        | 0.372                              | 8          | 25°C               | 23        |
| Ag-NP/C                              | 0.05      | 2.8                       | 0.01                               | 25         | R.T.               | 24        |
| Au/g-C <sub>3</sub> N <sub>4</sub>   | 0.07      | 50                        | 0.356                              | 8          | 25°C               | 25        |

**Table S3 The performance of various catalysts for HER**

| Samples                  | $\eta_{10}$ (mV) | Tafel slope (mV dec <sup>-1</sup> ) | Exchange current $j_0$ (mA cm <sup>-2</sup> ) |
|--------------------------|------------------|-------------------------------------|-----------------------------------------------|
| ZN-1-350                 | 109              | 124                                 | 1.03                                          |
| Ni(OH) <sub>2</sub> -350 | 198              | 146                                 | 0.39                                          |
| ZIF-67-350               | 453              | 153                                 | 0.014                                         |
| Pt/C                     | 50               | 54                                  | -                                             |
| ZN-1-300                 | 477              | 161                                 | -                                             |
| ZN-1-400                 | 179              | 143                                 | -                                             |
| ZN-1-450                 | 217              | 144                                 | -                                             |
| ZN-0.5-350               | 181              | 144                                 | -                                             |
| ZN-2-350                 | 135              | 124                                 | -                                             |
| ZN-3-350                 | 104              | 169                                 | -                                             |

## References

- 1 W. Sun, X. Rui, J. Zhu, L. Yu, Y. Zhang, Z. Xu, S. Madhavi and Q. Yan, *Journal of Power Sources*, 2015, **274**, 755.
- 2 J. Feng, Q. Wang, D. Fan, L. Ma, D. Jiang, J. Xie and J. Zhu, *Applied Surface Science*, 2016, **382**, 135.
- 3 Y. Qu, M. Yang, J. Chai, Z. Tang, M. Shao, C. Tat Kwok, M. Yang, Z. Wang, D. Chua, S. Wang, Z. Lu and H. Pan., *ACS Appl. Mater. Interfaces*, 2017, **9**, 5959.
- 4 Y. Kyung Jo, M. Kim, X. Jin, I. Young Kim, J. Lim, N. Lee, Y. Kyu Hwang, J. Chang, H. Kim and S. Hwang, *Chem. Mater.*, 2017, **29**, 1028.
- 5 L. Kong, Z. Ren, S. Du, J. Wu and H. Fu, *Chem. Commun.*, 2014, **50**, 4921.
- 6 Y. Xu, W. Tu, B. Zhang, S. Yin, Y. Huang, M. Kraft and R. Xu, *Adv. Mater.*, 2017, 1605957.
- 7 C. Zhu, A. Wang, W. Xiao, D. Chao, X. Zhang, N. Huy Tiep, S. Chen, J. Kang, X. Wang, J. Ding, J. Wang, H. Zhang and H. Fan, *Adv. Mater.*, 2018, 1705516.
- 8 R. K. Vishnu Prataap and S. Mohan, *Chem. Commun.*, 2017, **53**, 3365.
- 9 K. Xu, P. Chen, X. Li, Y. Tong, H. Ding, X. Wu, W. Chu, Z. Peng, C. Wu and Yi Xie, *J. Am. Chem. Soc.*, 2015, **137**, 4119.
- 10 P. Chen, K. Xu, Y. Tong, X. Li, S. Tao, Z. Fang, W. Chu, X. Wu and C. Wu, *Inorg. Chem. Front.*, 2016, **3**, 236.
- 11 X. Li, C. Zeng, J. Jiang and L. Ai, *J. Mater. Chem. A*, 2016, **4**, 7476.
- 12 S. Deng, N. Chen, D. Deng, Y. Li, X. Xing and Y. Wang, *Ceramics International*, 2015, **41**, 11004.
- 13 C. Ray, S. Chan Lee, B. Jin, A. Kundu, J. Hyeok Park and S. Chan Jun, *J. Mater. Chem. A*, 2018, **6**, 4466.
- 14 F. Xi, X. Cao, F. Qu, A. M. Asiri and X. Sun., *Sensors and Actuators B*, 2018, **255**, 1254.
- 15 D. Gao, J. Zhang, T. Wang, W. Xiao, K. Tao, D. Xue and J. Ding, *J. Mater. Chem. A*, 2016, **4**, 17363.
- 16 J. Wang, F. Xu, H. Jin, Y. Chen and Y. Wang, *Adv. Mater.*, 2017, **29**, 1605838.
- 17 J. Xia, G. He, L. Zhang, X. Sun and X. Wang, *Appl. Catal. B: Environ.*, 2016, **180**, 408.
- 18 J. Feng, Q. Wang, D. Fan, L. Ma, D. Jiang, J. Xie and J. Zhu, *Applied Surface Science*, 2016, **382**, 135.
- 19 Y. Gu, Y. Jiao, X. Zhou, A. Wu, B. Buhe and H. Fu, *NanoResearch*, 2018, **11**, 126.
- 20 H. Chen, M. Yang, S. Tao and G. Chen, *Appl. Catal. B: Environ.*, 2016, **198**, 74.
- 21 S. Gao, Z. Zhang, K. Liu and B. Dong, *Applied Catalysis B: Environmental*, 2016, **188**, 245.
- 22 W. Ye, J. Yu, Y. Zhou, D. Gao, D. Wang, C. Wang and D. Xue, *Applied Catalysis B: Environmental*, 2016, **181**, 371.
- 23 P. Zhang, C. Shao, Z. Zhang, M. Zhang, J. Mu, Z. Guo and Y. Liu, *Nanoscale*, 2011, **3**, 3357.
- 24 S. Tang, S. Vongehr and X. Meng, *J. Phys. Chem. C*, 2010, **114**, 977.
- 25 Y. Fu, T. Huang, B. Jia, J. Zhu and X. Wang, *Applied Catalysis B: Environmental*, 2017, **202**, 430.
